# Supplementary material
Source: PubMed Central journal article supplement (PMC5880099)

# CKAP4

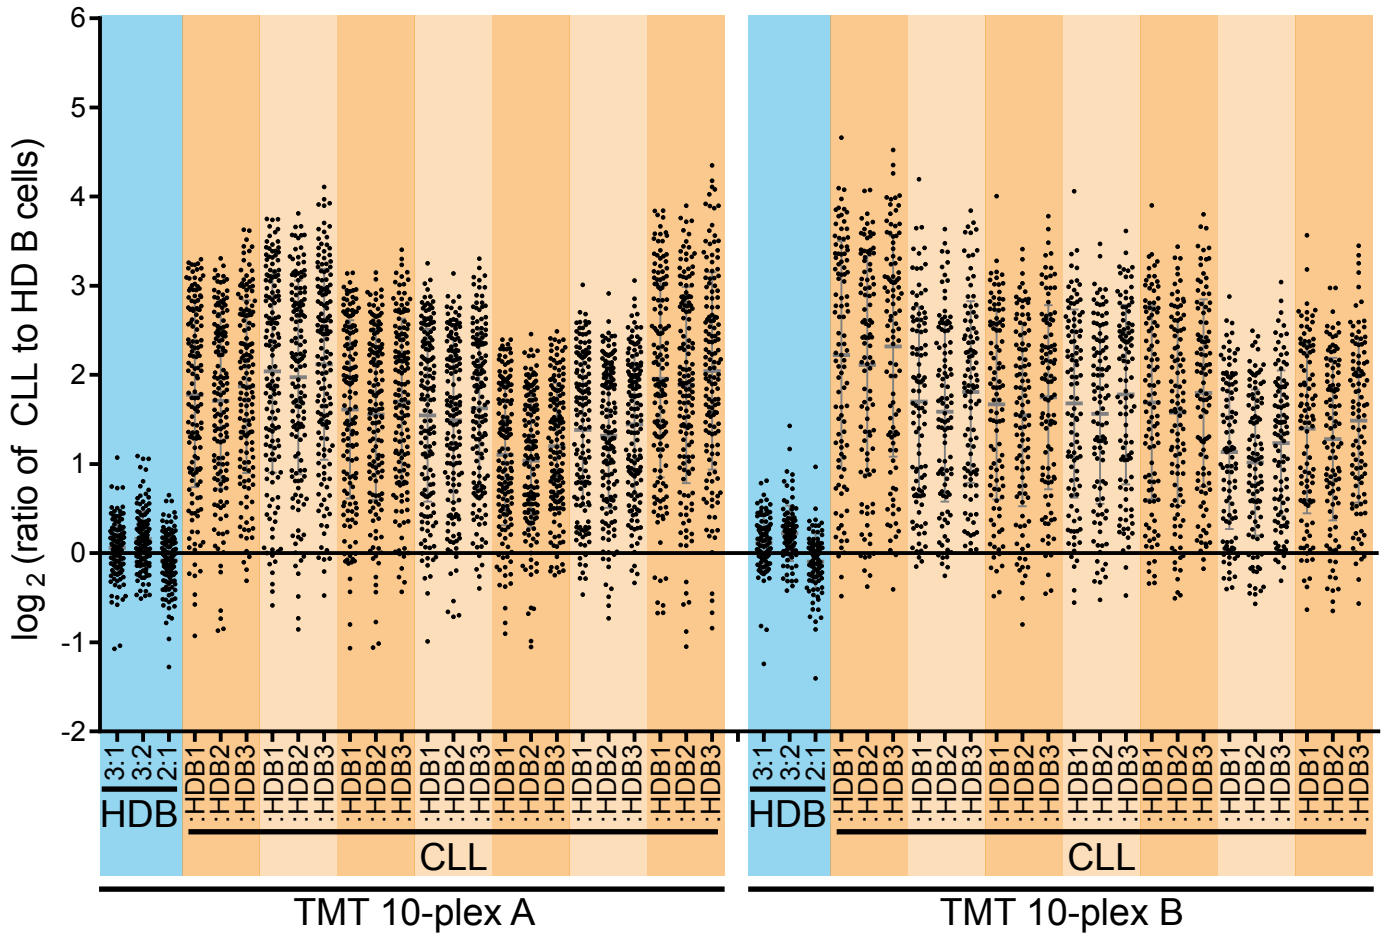

TMT  
10-plex A

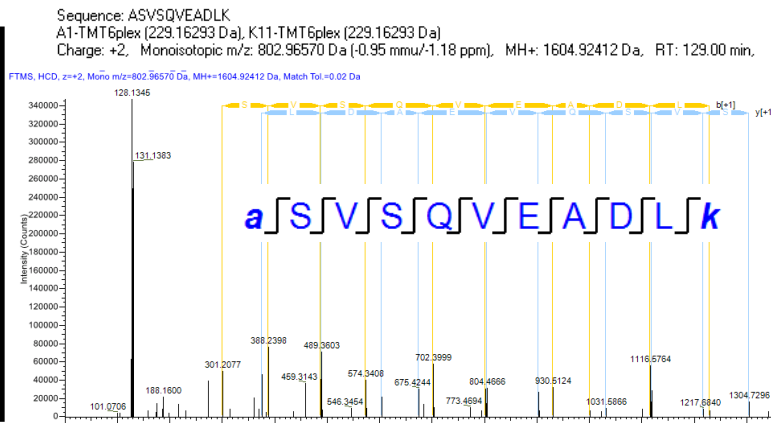

TMT  
10-plex B

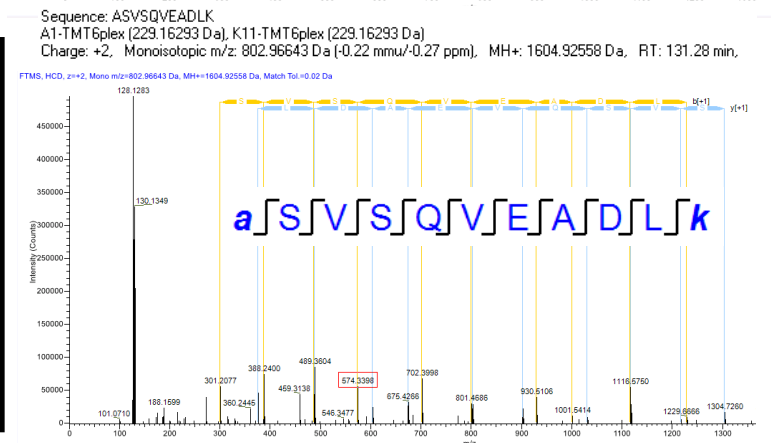

**Figure S4.** All PSM quantitations uniquely matching the 10 previously unobserved cell surface proteins for all 14 CLL samples relative to each of the 3 healthy donor B-cell samples. Additionally, representative spectra matching unique peptides to these proteins identified independently in both TMT 10-plex experiments.

# PIGR

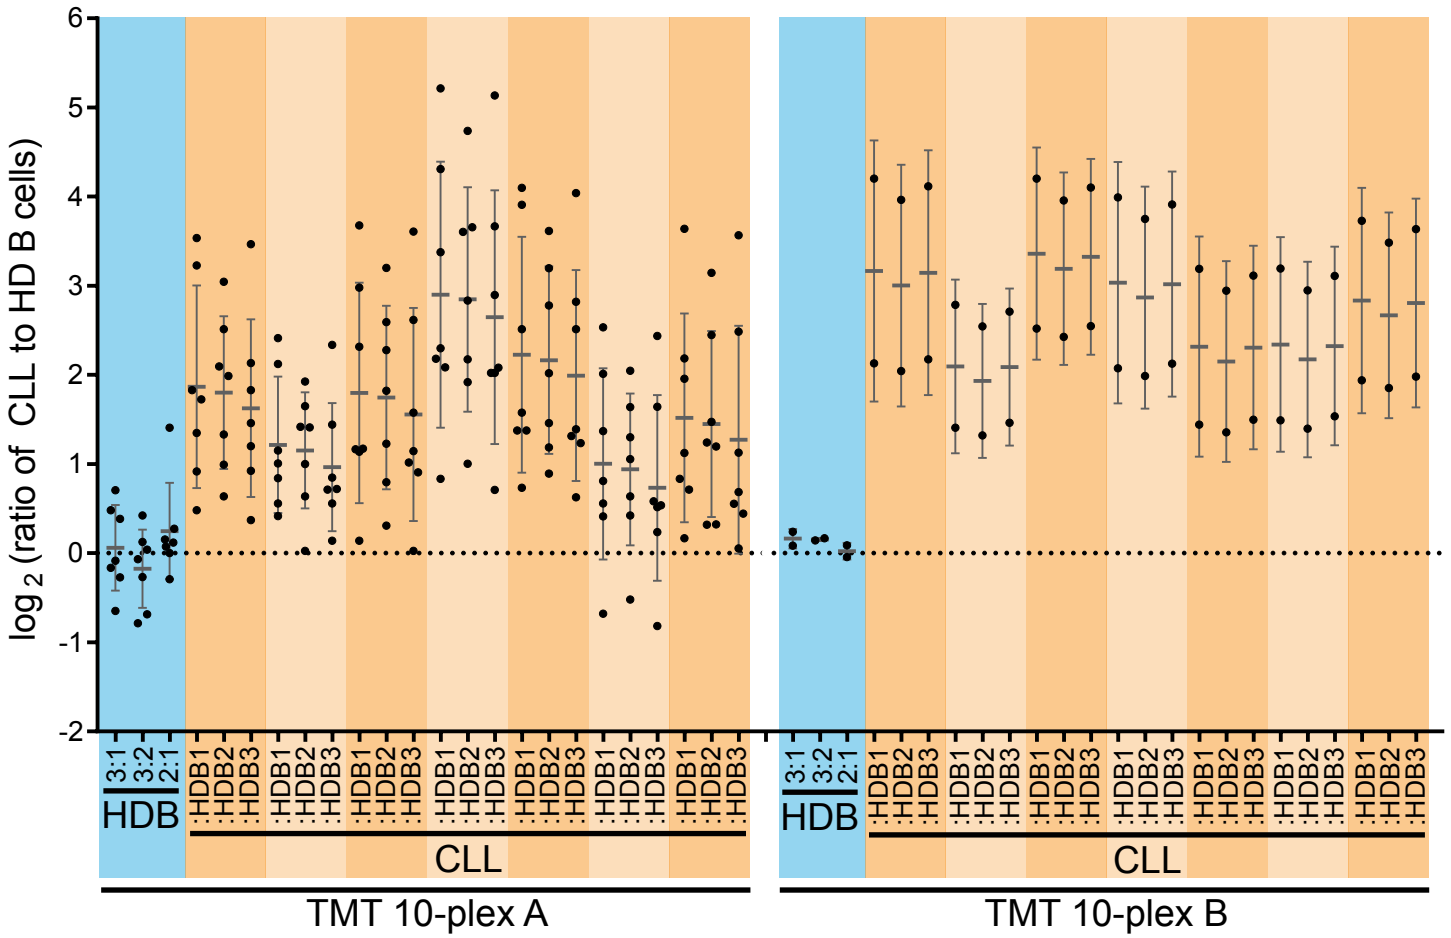

TMT 10-plex A

Sequence: SSKEEAEMAYK  
 S1-TMT6plex (229.16293 Da), K3-TMT6plex (229.16293 Da), K11-TMT6plex (229.16293 Da)  
 Charge: +3, Monoisotopic m/z: 654.02679 Da (-0.22 mmu/-0.34 ppm), MH+: 1960.06583 Da, RT: 66.79 min.

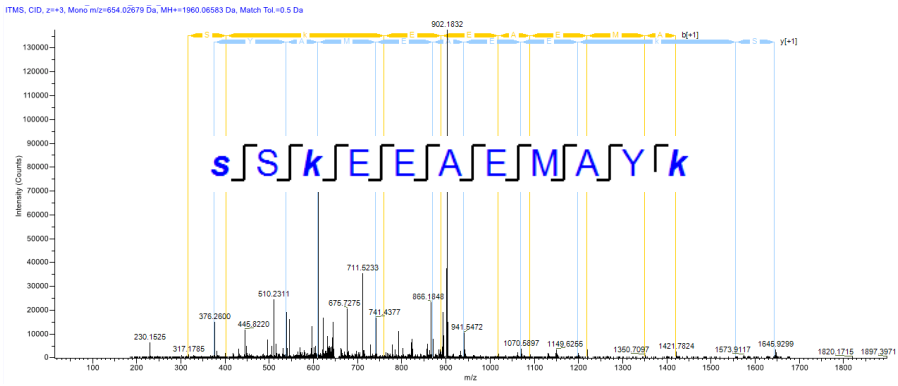

TMT 10-plex B

Sequence: SSKEEAEMAYK  
 S1-TMT6plex (229.16293 Da), K3-TMT6plex (229.16293 Da), K11-TMT6plex (229.16293 Da)  
 Charge: +3, Monoisotopic m/z: 654.02545 Da (-1.57 mmu/-2.4 ppm), MH+: 1960.06180 Da, RT: 61.18 min.

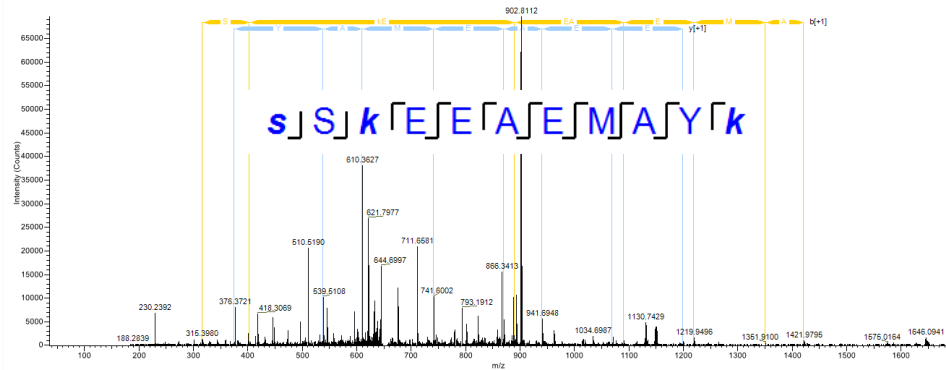

# LAX1

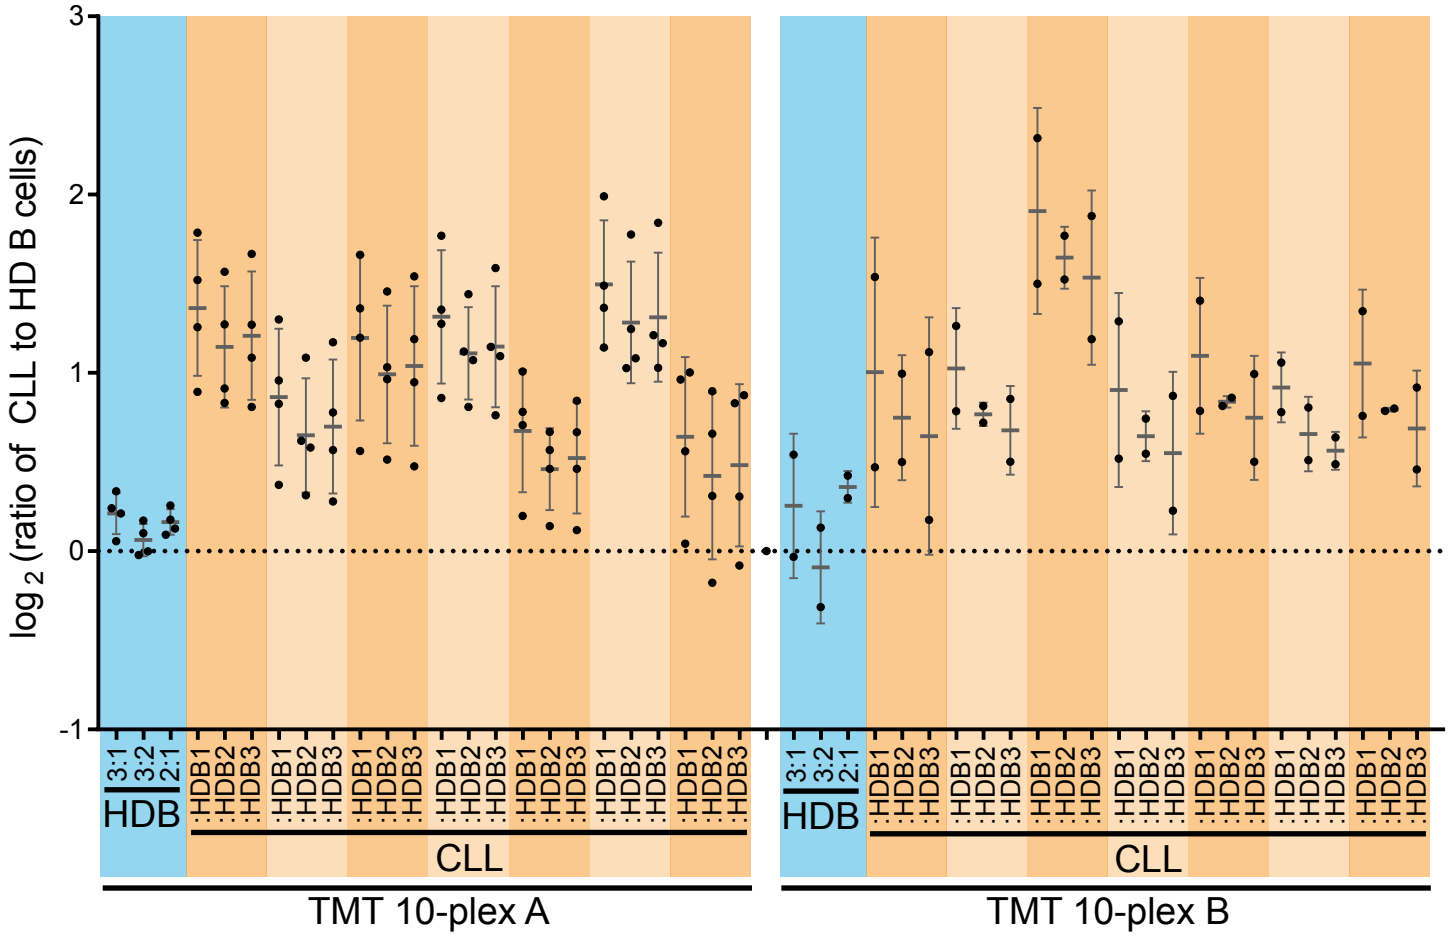

TMT  
10-plex A

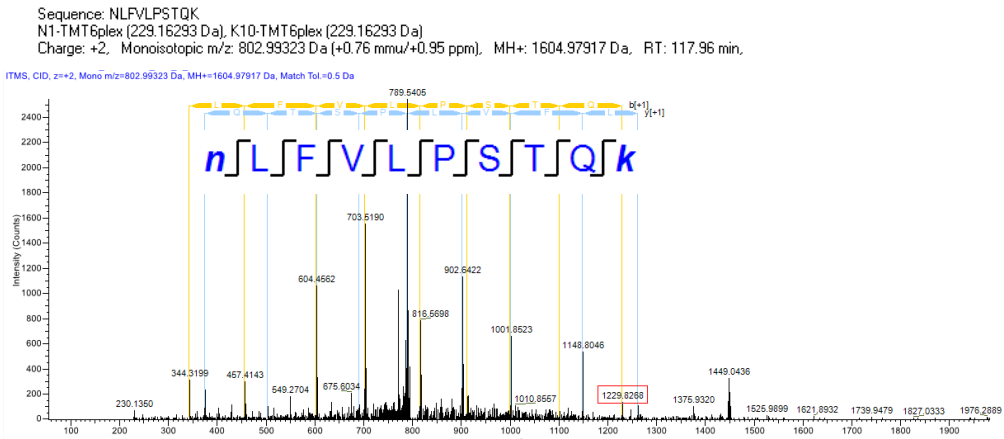

TMT  
10-plex B

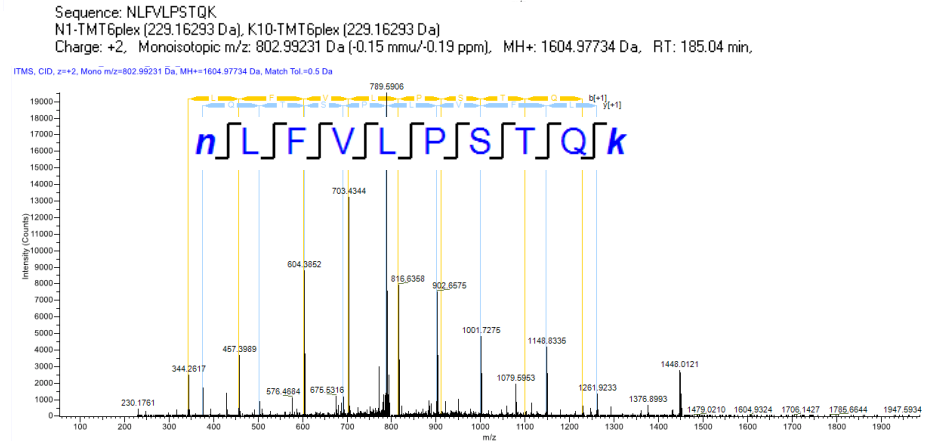

# CLEC17A

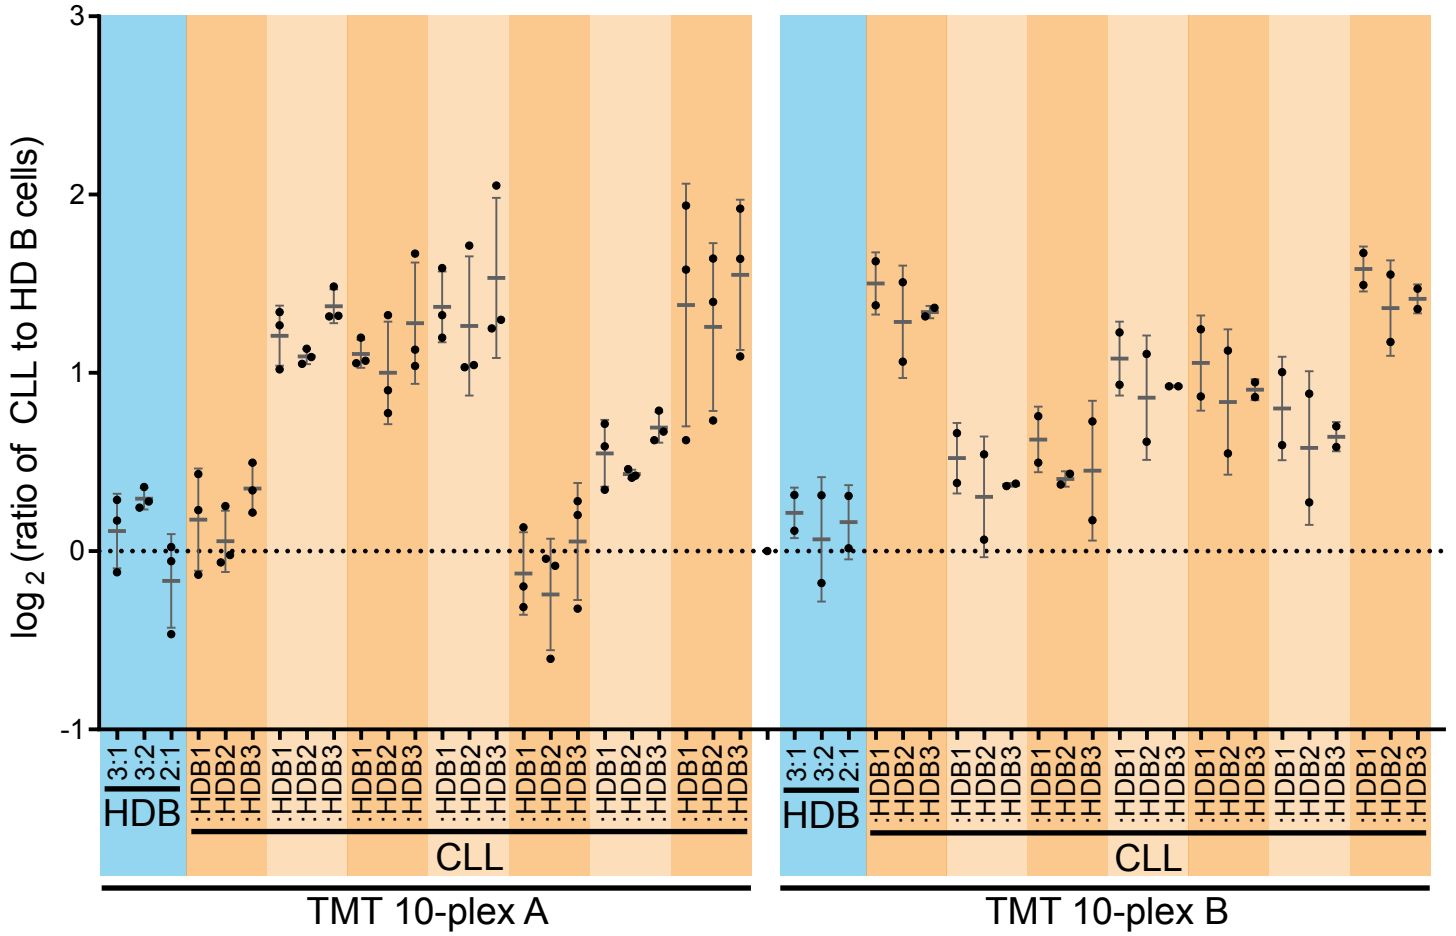

TMT  
10-plex A

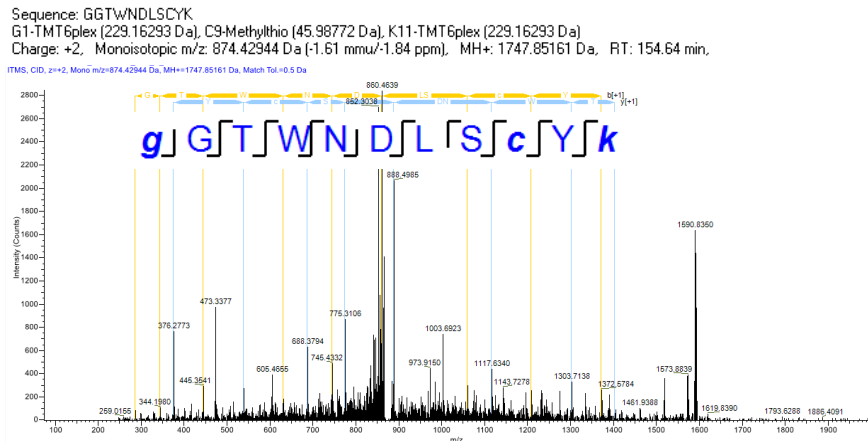

TMT  
10-plex B

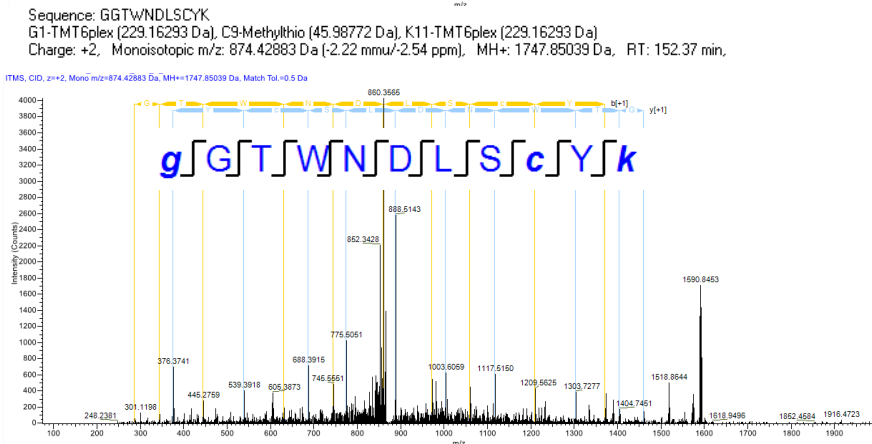

# ATP2B4

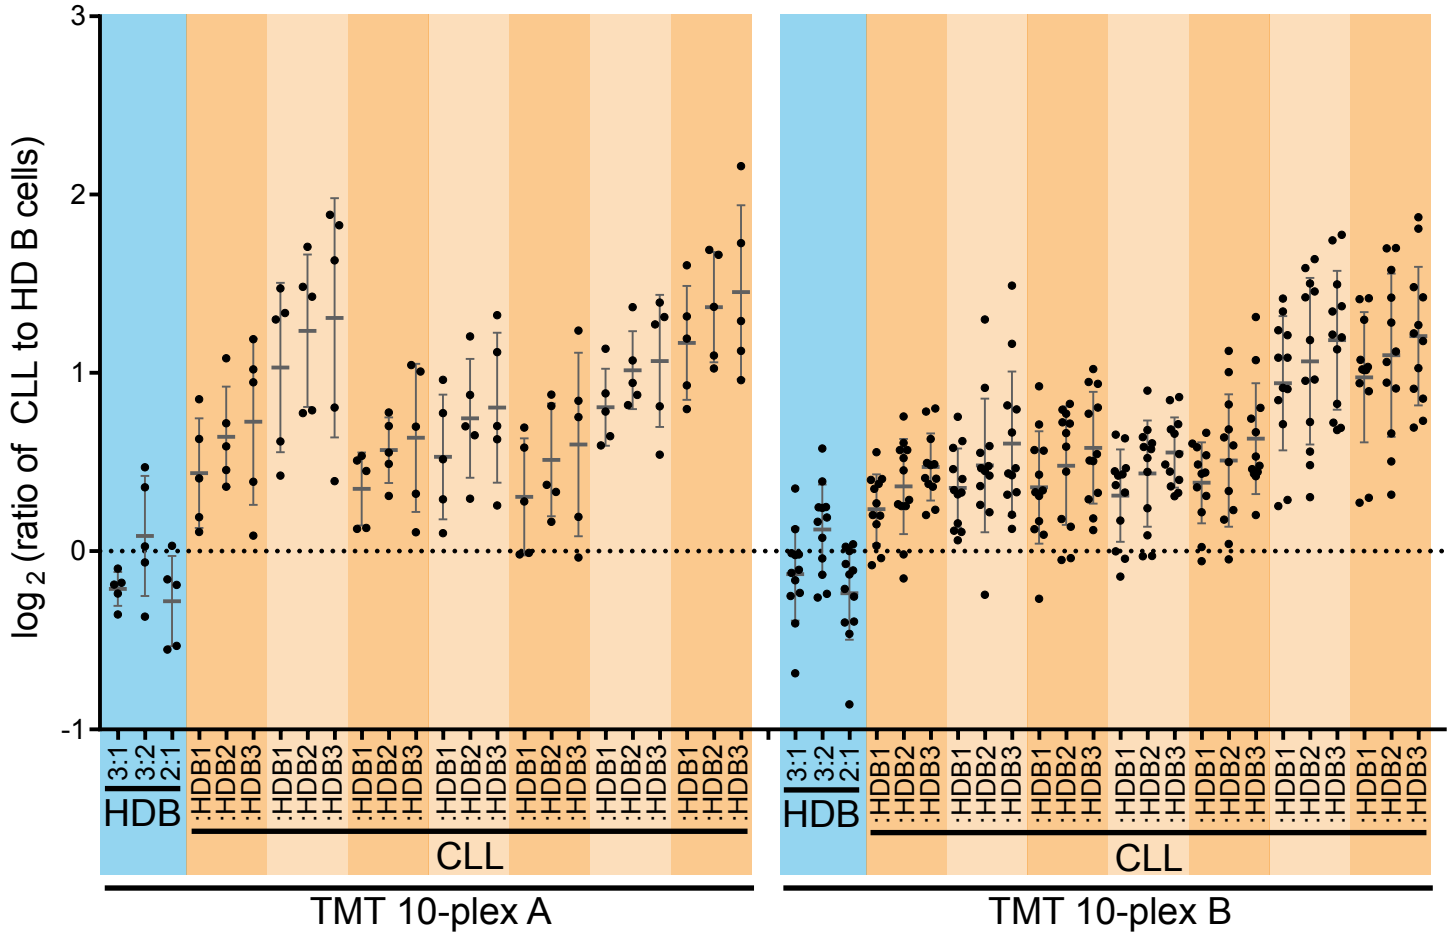

TMT 10-plex A

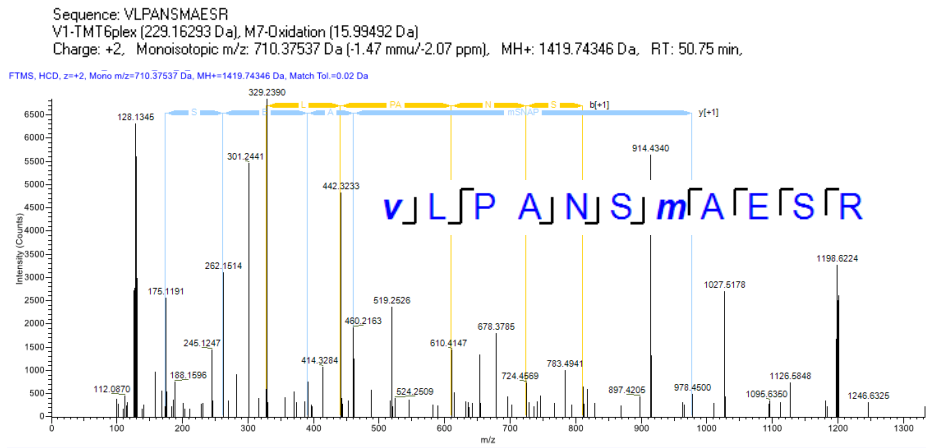

TMT 10-plex B

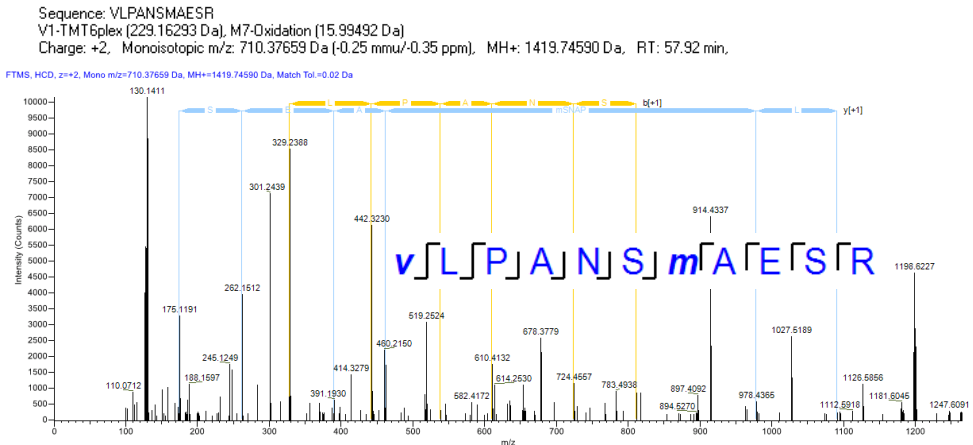

# TMCC3

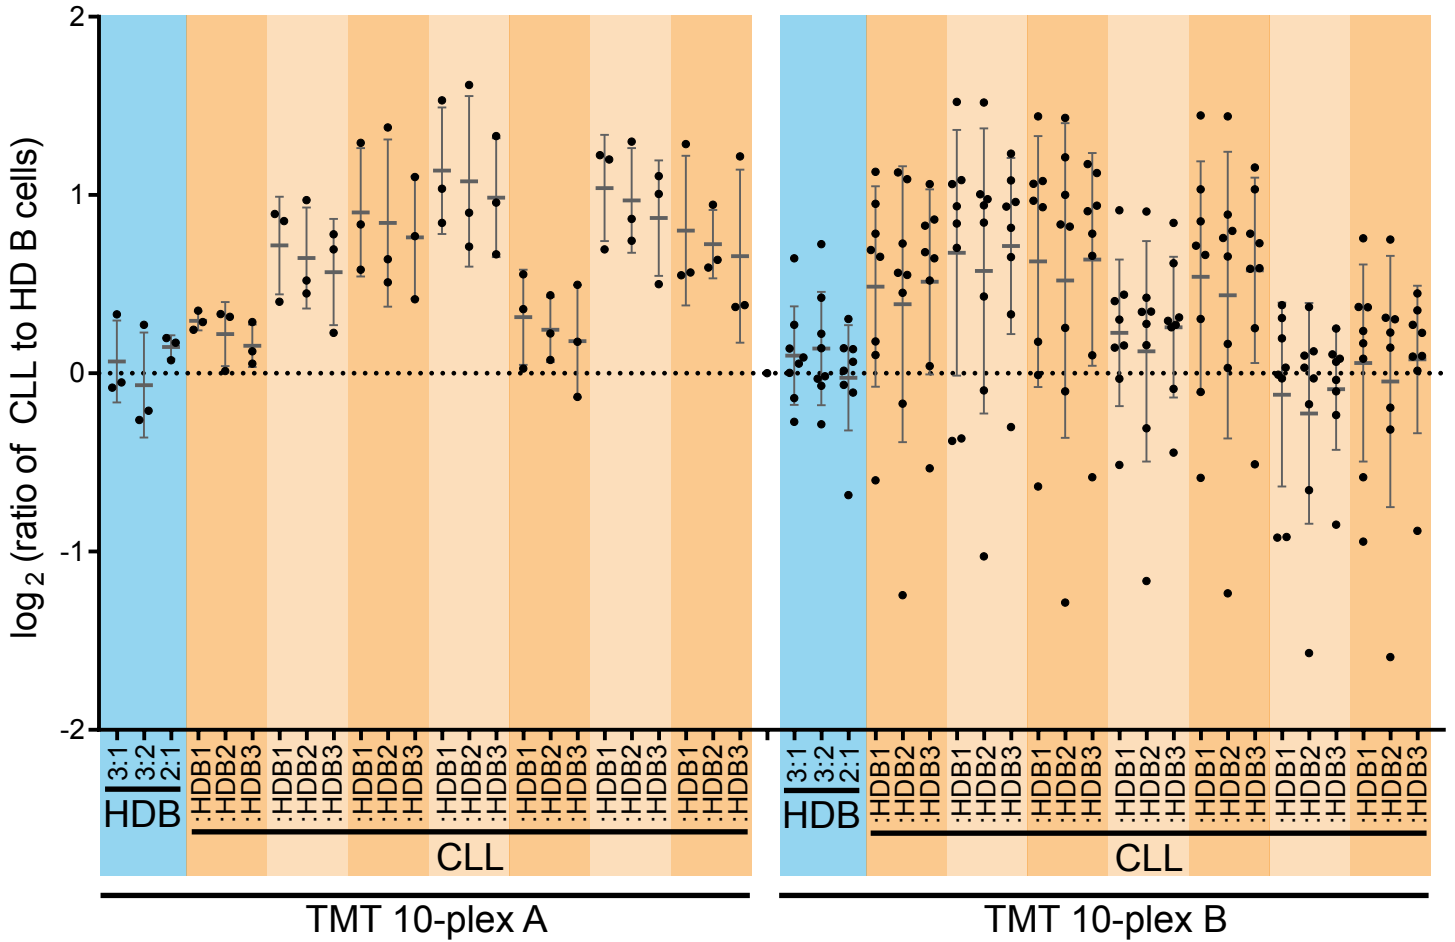

TMT  
10-plex A

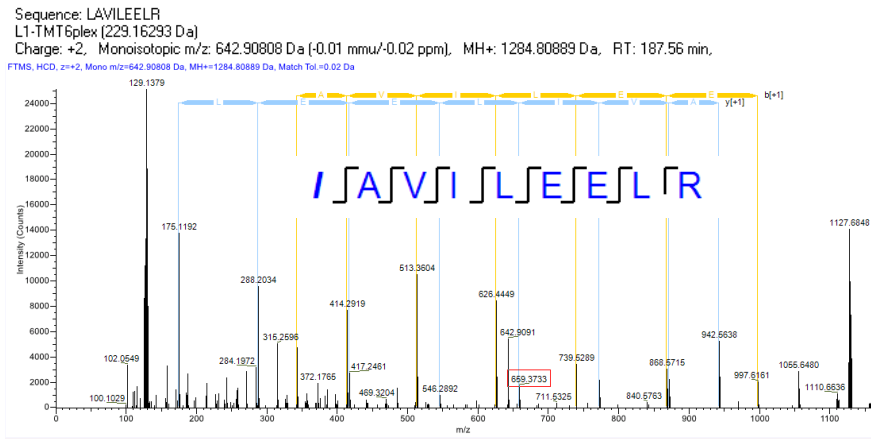

TMT  
10-plex B

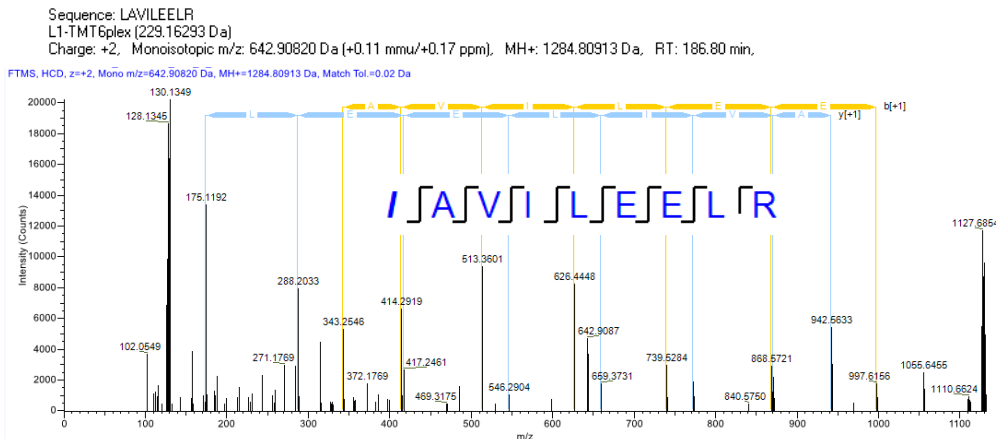

# ST6GAL1

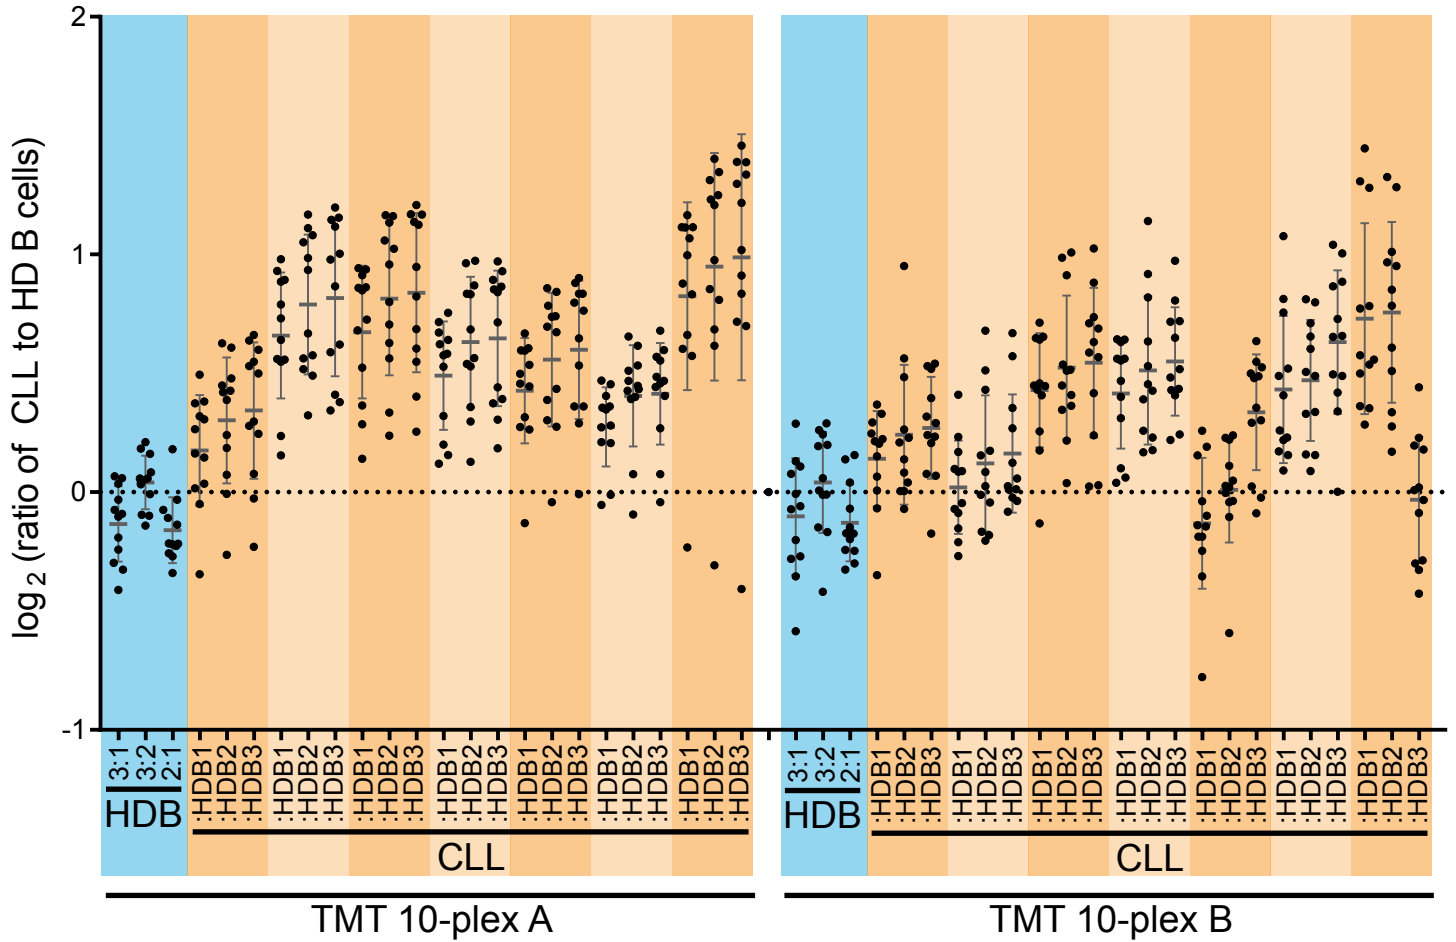

TMT 10-plex A

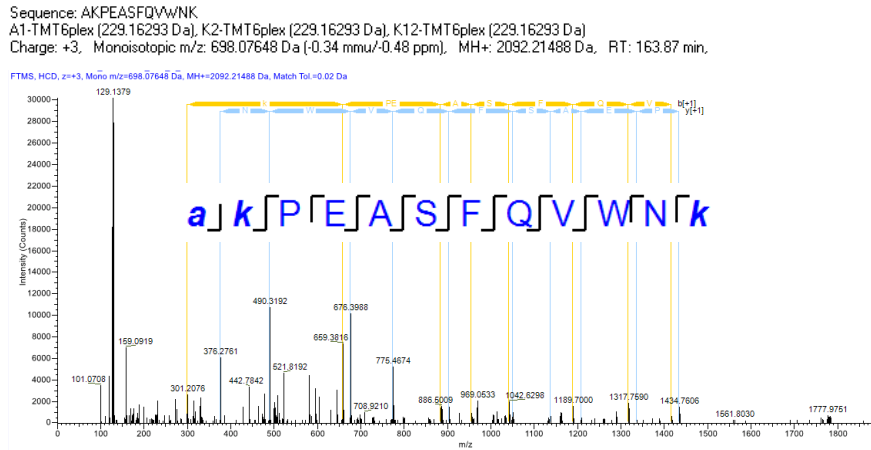

TMT 10-plex B

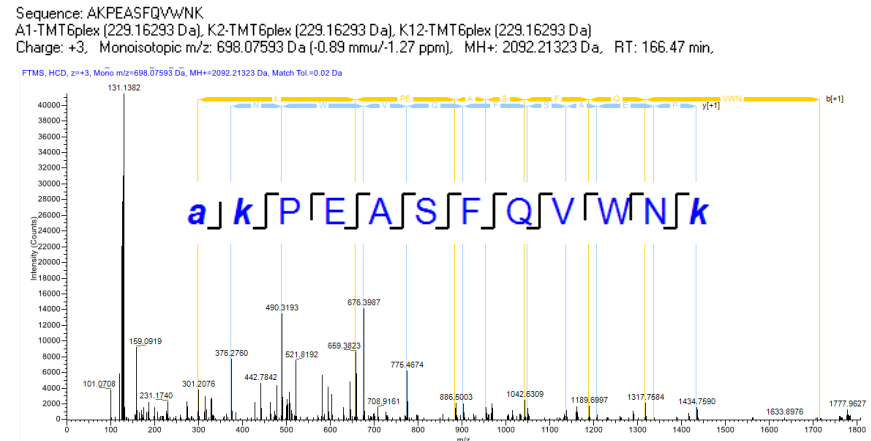

# ATP1B1

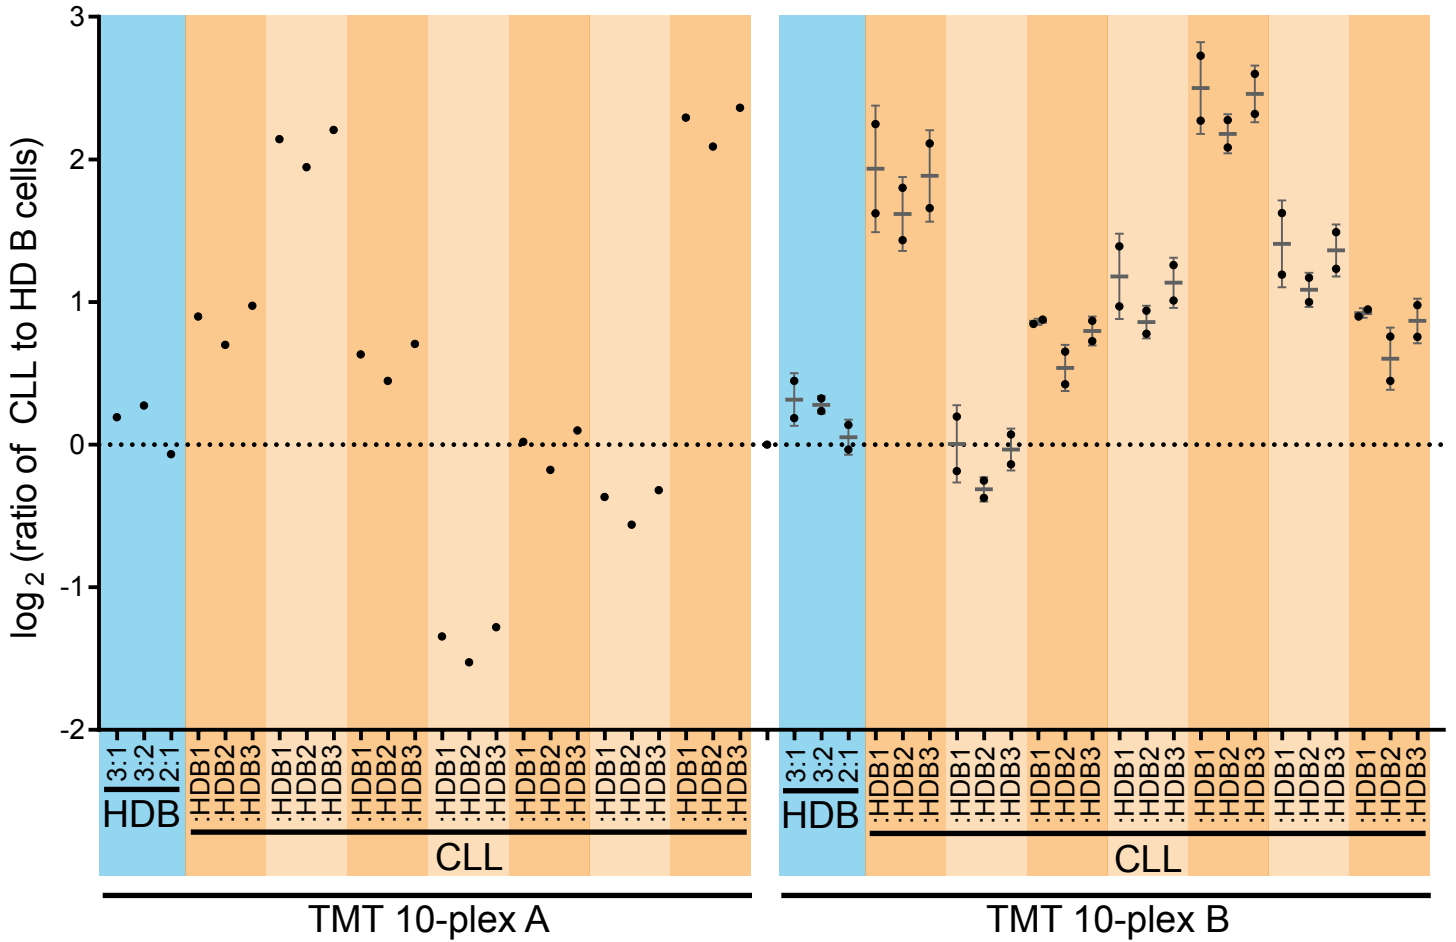

TMT  
10-plex A

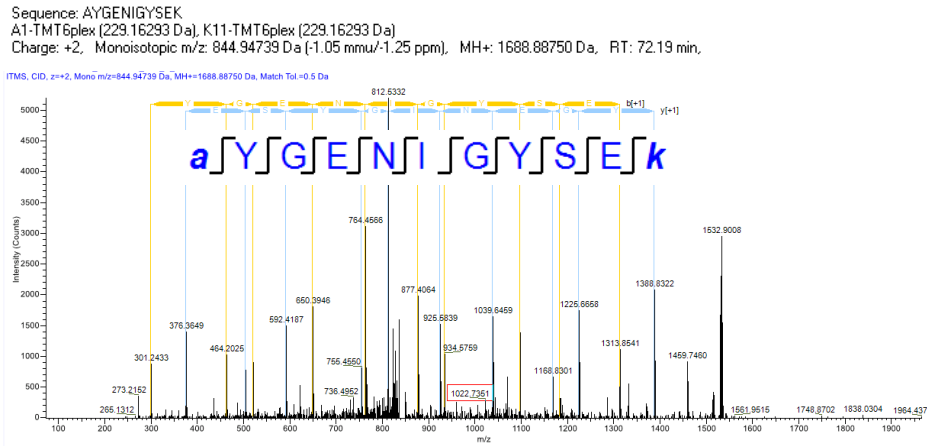

TMT  
10-plex B

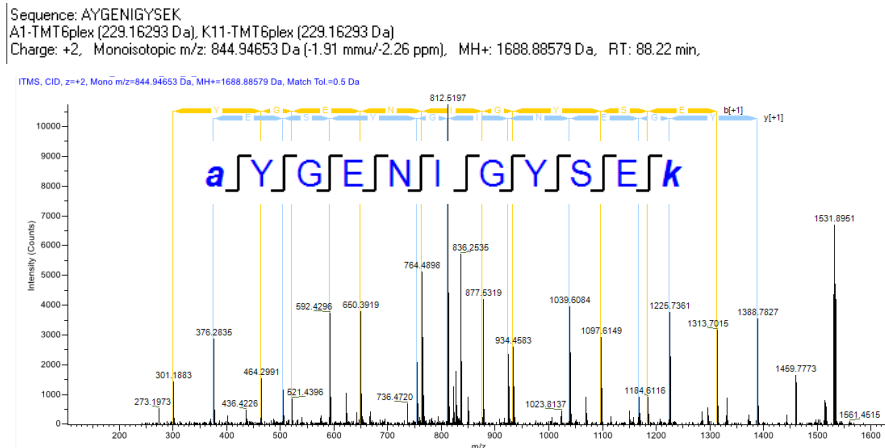



# C17orf80

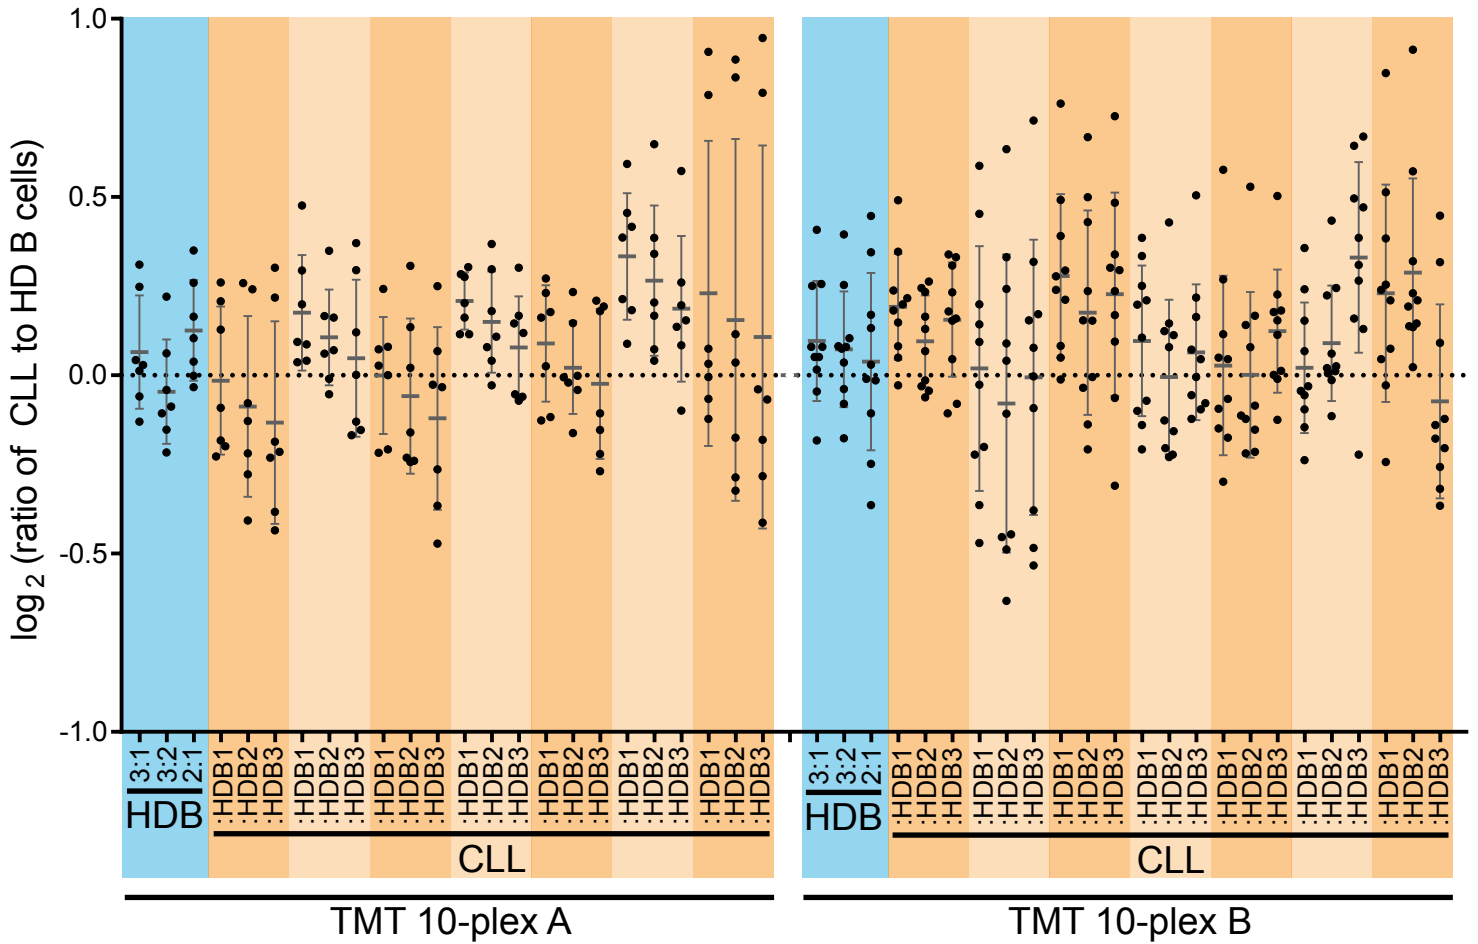

TMT  
10-plex A

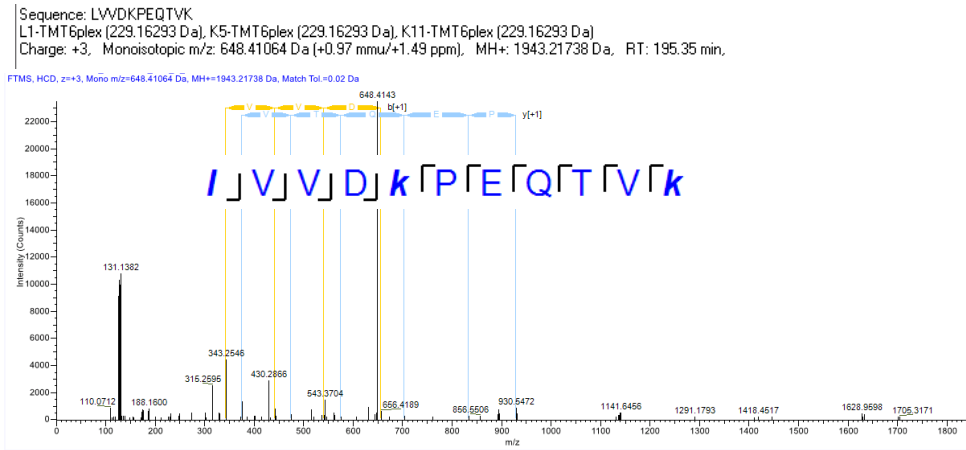

TMT  
10-plex B

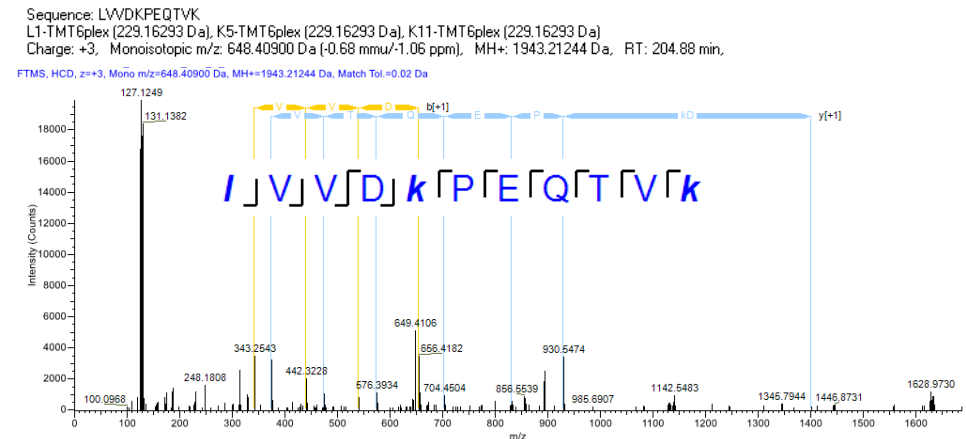

# NPTN

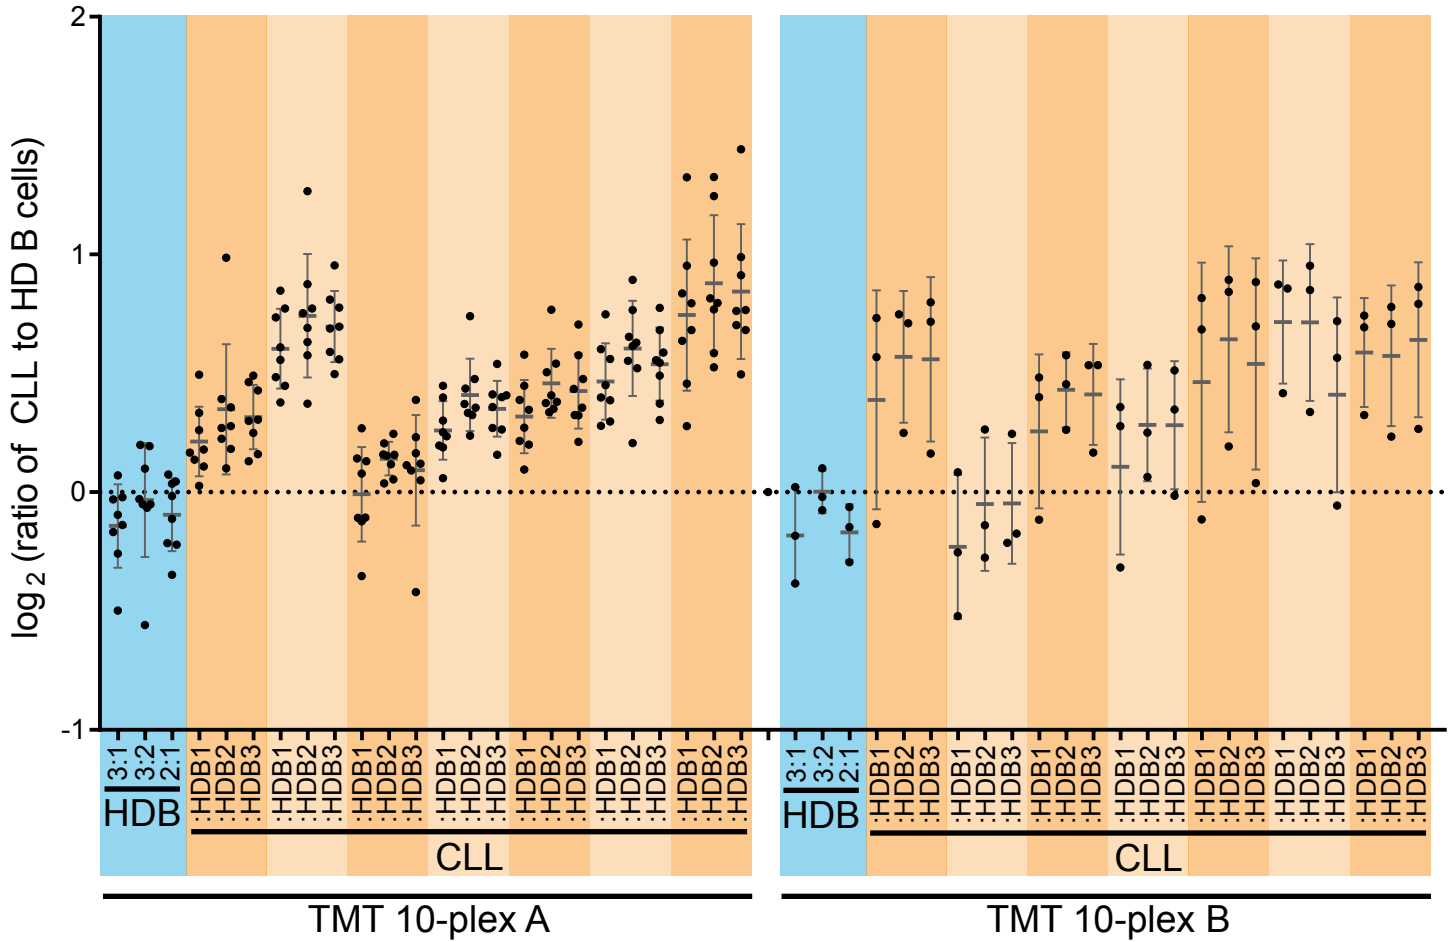

TMT 10-plex A

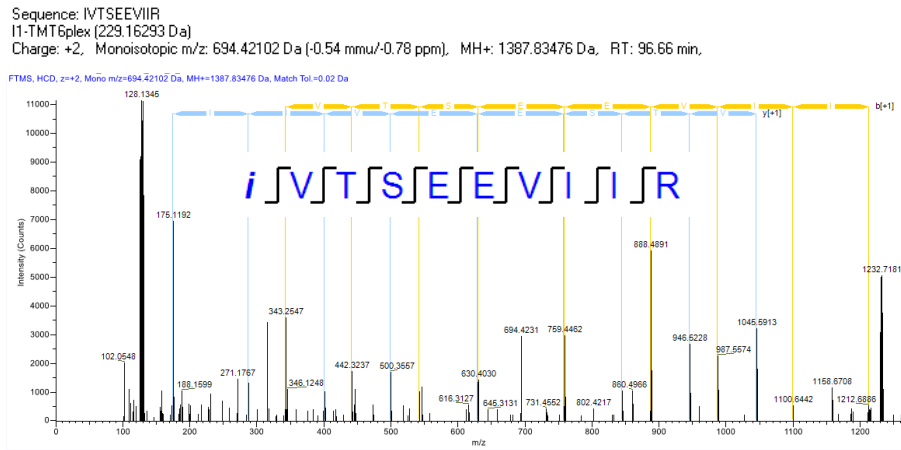

TMT 10-plex B

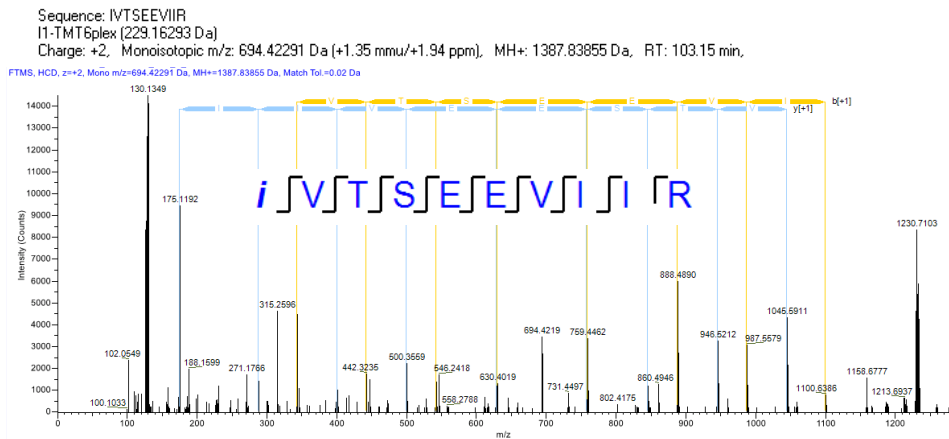

Supplement: supp_RA117.000539_134638_0_supp_38935_p0y4zb.pdf [file supp_RA117.000539_134638_0_supp_38935_p0y4zb.pdf]
