# Supplementary material
Source: PubMed Central journal article supplement (PMC5880099)

**Figure S3. Analysis of emerging subtype-specific expression patterns across CLL.**

**A.** Summary of subtype-specific protein expression determined by differential regulation score ( $\Delta R_s = R_s \text{ subtype A} - R_s \text{ subtype B}$ ). **B.** Volcano plots highlighting examples of the most upregulated and downregulated proteins in each subtype. Statistical testing was applied as a means of highlighting an approximate signature. **C.** Chromosome enrichment analysis of the 214 trisomy 12-overexpressed proteins, additionally highlighting the expression of those proteins relative to B-cell controls. **D.** Chr12-encoded protein expression in trisomy 12 samples relative to HDB, compared to that of non-chr12 proteins. **E.** IPA upstream regulator analysis of the proteins regulated in trisomy 12 versus disomy 12 CLL. **F.** literature-derived associations between trisomy 12-upregulated chromosome 12 proteins and p53, highlighting the expression in individual samples. **G.** The location of each protein's gene on chromosome 12, of those described in F. **H.** Pathway describing those 10 proteins (from F.) suggested to interfere with effective p53 function.

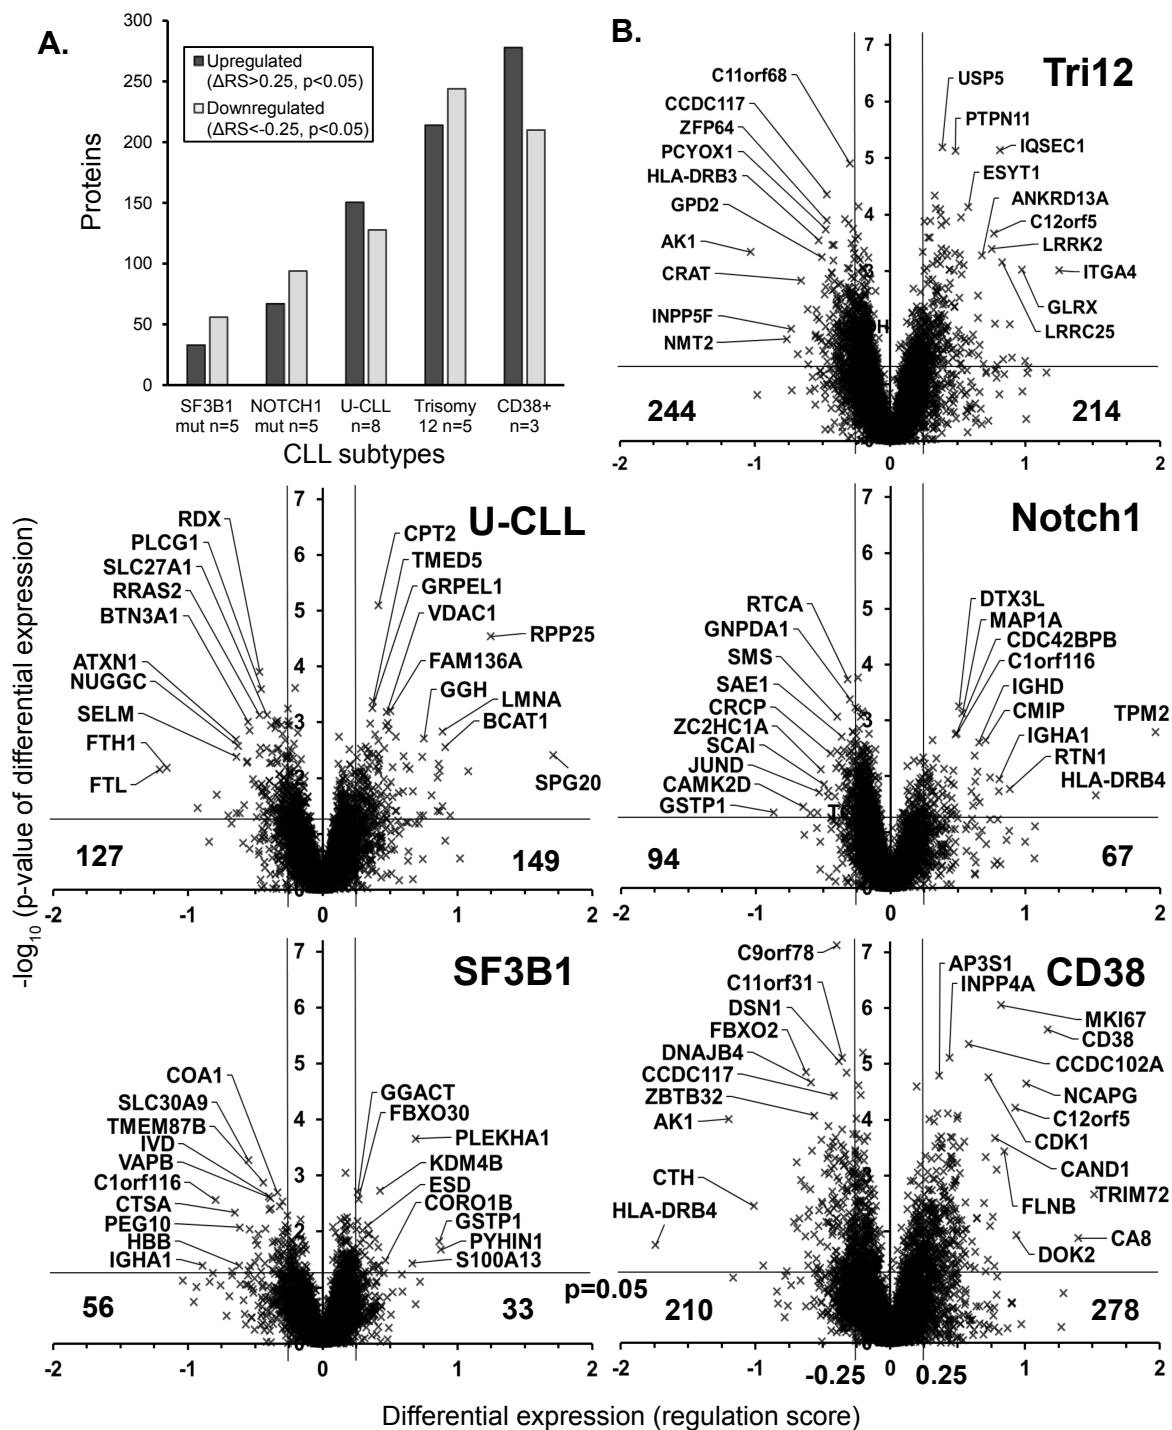

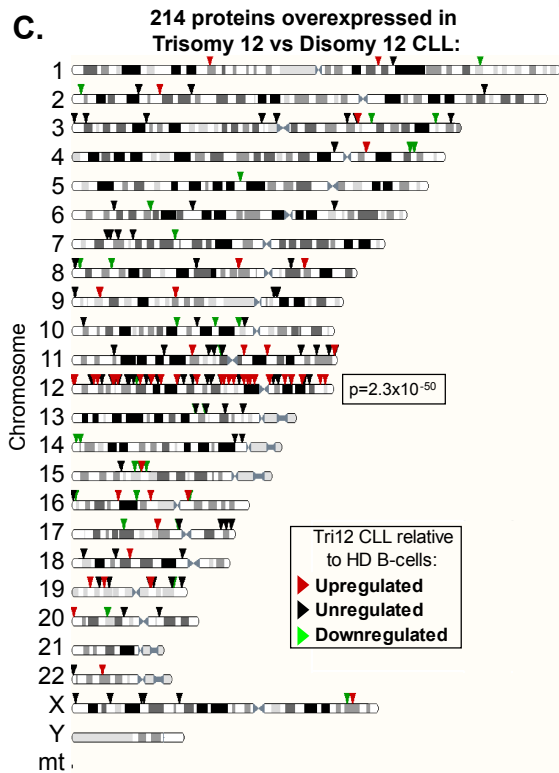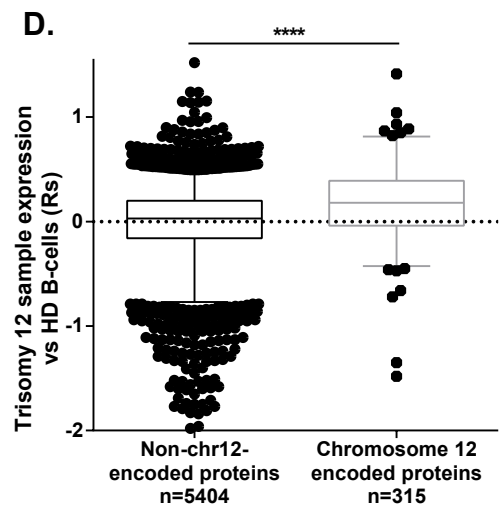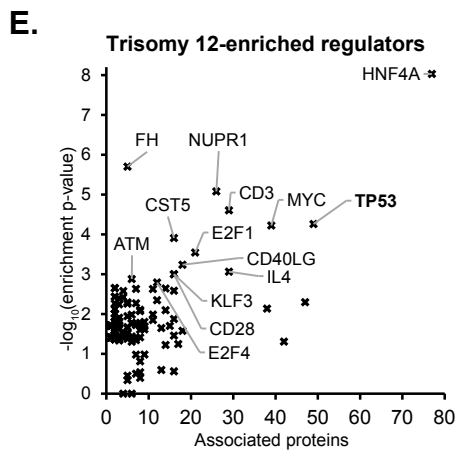

**F.** Trisomy 12-overexpressed chr12-encoded p53-associated proteins

| Protein                                                | Evidence (Unique peptides, PSMs) | Log <sub>2</sub> (ratios to HDB) (Disomy 12 vs Trisomy 12) | Tri12 ΔRs p-value | Effects on p53                               |
|--------------------------------------------------------|----------------------------------|------------------------------------------------------------|-------------------|----------------------------------------------|
| Ubiquitin carboxyl-terminal hydrolase 5 (USP5)         | 26, 312                          |                                                            | 0.39<br>6.4E-6    | Negatively regulates p53                     |
| Tyr phosphatase non-receptor type 11 (SHP2/PTPN11)     | 26, 197                          |                                                            | 0.48<br>7.4E-6    | Signalling inhibits p53-induced senescence   |
| Ubiquitin carboxyl-terminal hydrolase 15 (USP15)       | 26, 199                          |                                                            | 0.33<br>4.6E-5    | Stabilises MDM2 expression                   |
| TP53-regulated inhibitor of apoptosis 1 (TRIA1/p53CSV) | 3, 31                            |                                                            | 0.53<br>1.1E-4    | Repressor of p21                             |
| Arf-GAP with GTPase, ANK/PH 2 (AGAP2/PIKE-A)           | 8, 51                            |                                                            | 0.42<br>1.3E-4    | Knock-down stabilised p53, acts via AKT/MDM2 |
| Proliferation-associated protein 2G4 (PA2G4/EBP1)      | 16, 421                          |                                                            | 0.25<br>1.3E-4    | Enhances MDM2-p53 association                |
| Thioredoxin reductase 1 (TXNRD1)                       | 18, 141                          |                                                            | 0.38<br>1.5E-4    | Inhibition increased p53-DNA binding         |
| TP53-induced glycolysis + apoptosis regulator (TIGAR)  | 6, 45                            |                                                            | 0.77<br>2.1E-4    | Inversely correlates with p53 expression     |
| RAS oncogene family member Rab-35 (RAB35/1c)           | 7, 216                           |                                                            | 0.44<br>9.3E-4    | Suppresses PRPK-induced p53 activation       |
| Tyr phosphatase non-receptor type 6 (SHP1/PTPN6)       | 41, 1521                         |                                                            | 0.46<br>7.3E-3    | Overexpression reduced p53 phosphorylation   |

**G.** Chromosome 12:

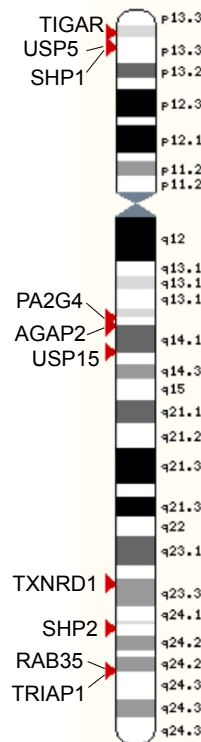

**H.** Tri12/Chr12 inhibitors of p53 activity

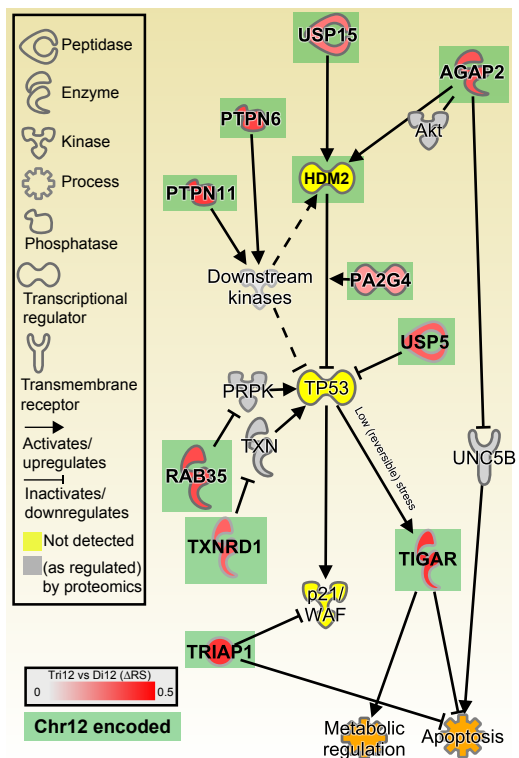

Supplement: supp_RA117.000539_134638_0_supp_61570_p32ffl.pdf [file supp_RA117.000539_134638_0_supp_61570_p32ffl.pdf]
