# Supplementary material
Source: PubMed Central journal article supplement (PMC5880099)

**Figure S1.** Evaluation of the qualitative and quantitative reproducibility between 10-plex A and B.

**A.** The numbers of identified and quantified proteins determined in experiments A and B and the commonly determined numbers for each of these.

**B.** The respective numbers of PSMs and peptides for each of the 7800 commonly identified proteins across experiments A and B.

**C.** The reproducibility of protein quantifications for the healthy donor B-cell (HDB) bridging controls characterised in each experiment.  $\log_2$  (ratios) of the commonly quantified proteins comparing HD1, HD2 and HD3 derived from 10-plexes A and B.

**D.** The reproducibility of protein quantifications of CLL versus the healthy donor (HD) bridging controls characterised in each TMT 10-plex experiment.  $\log_2$  (ratios) of the commonly quantified proteins comparing the average of the 7  $\log_2$  (CLL:HDB ratios) derived from each of the 10-plexes A and B.

**E.** Proteomics-derived quantitations for characteristic markers and known phenotypes of CLL and CLL subtypes, relative to HDB.

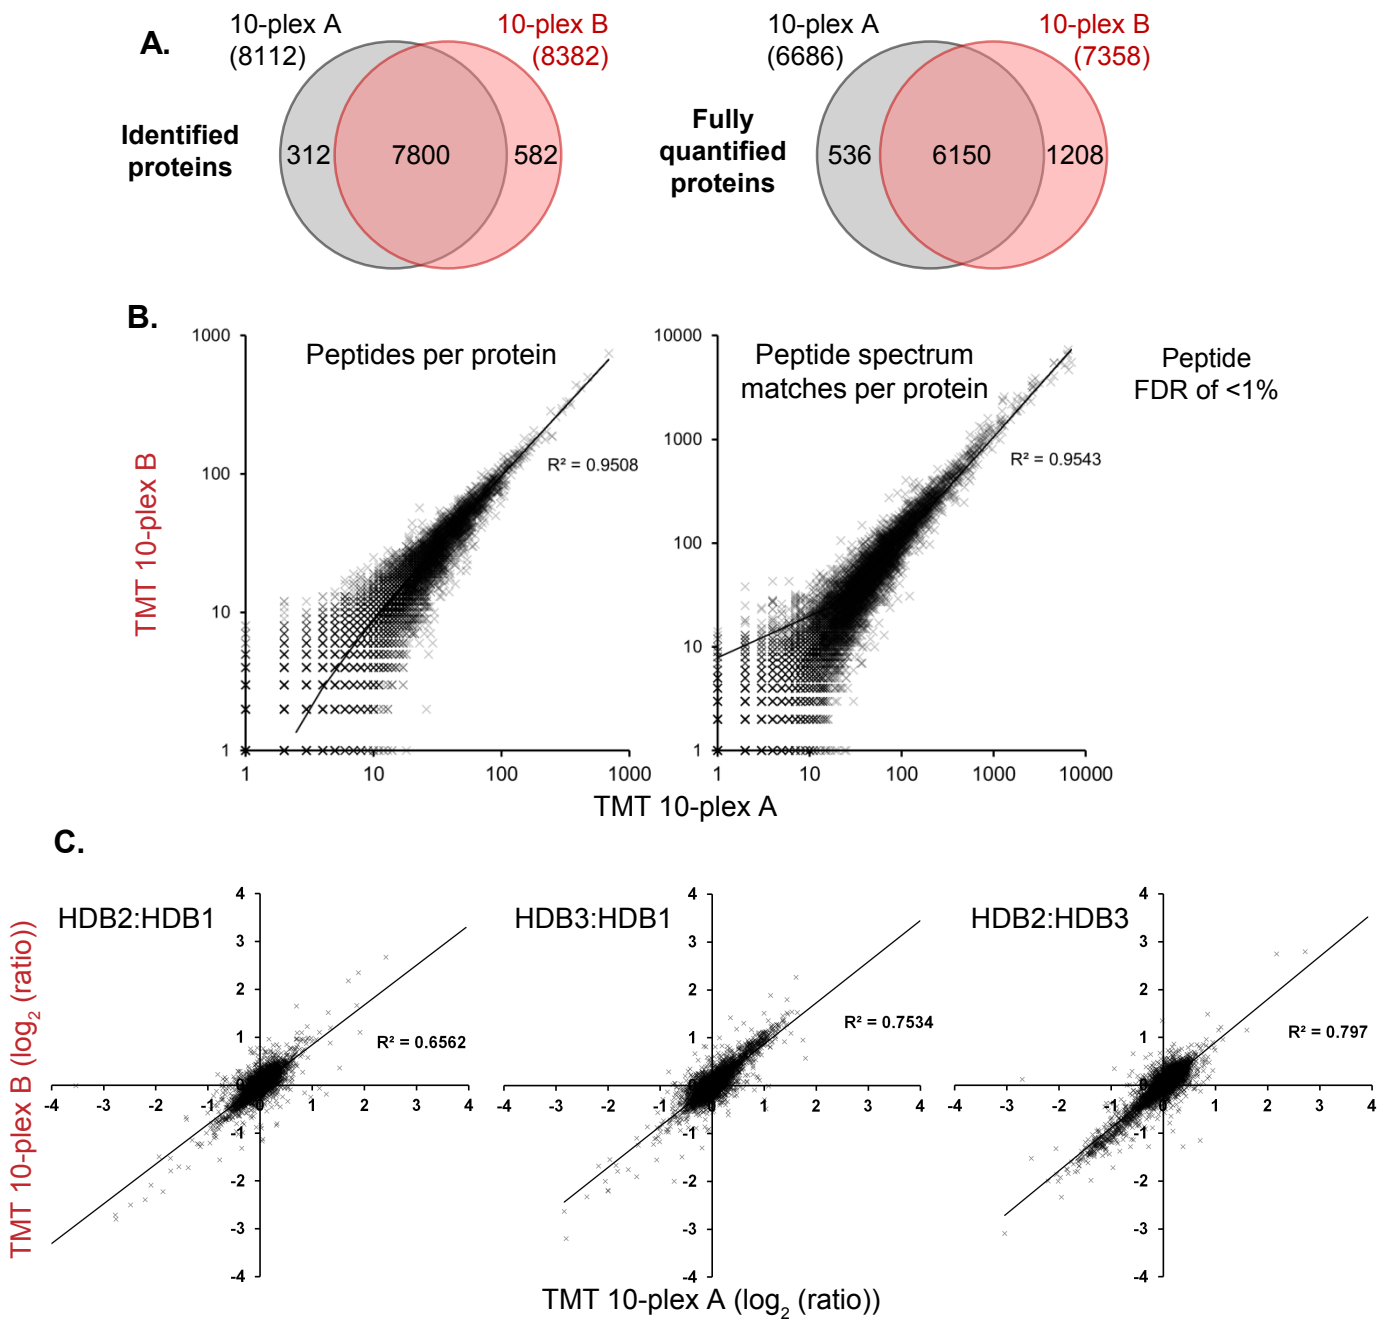

D.

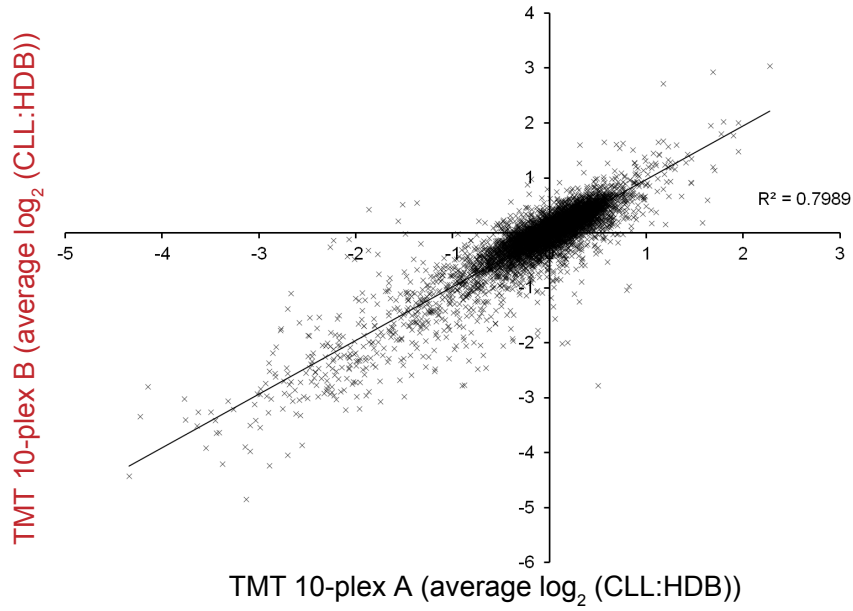

E.

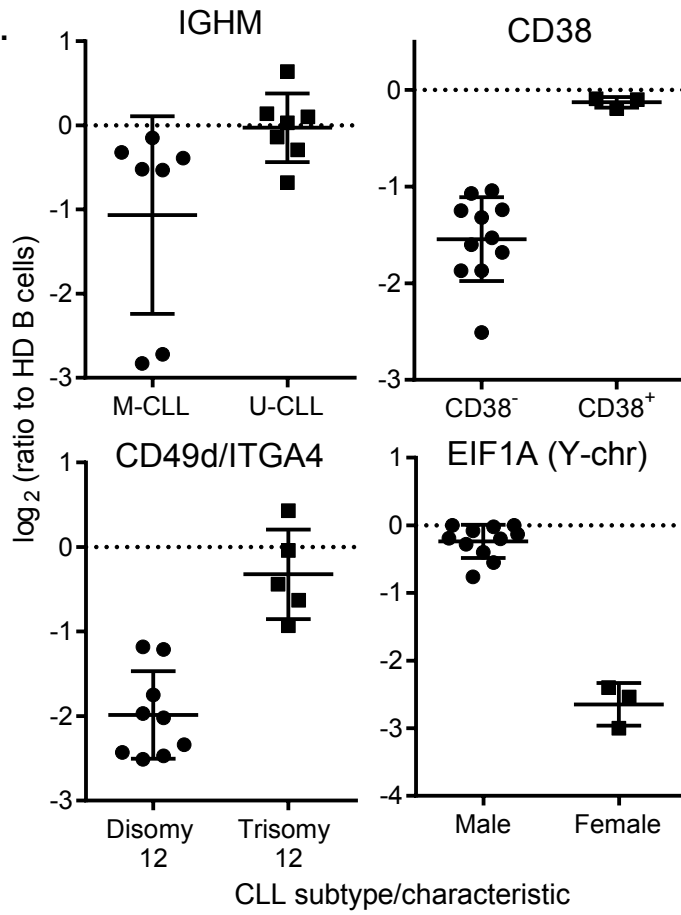

Supplement: supp_RA117.000539_134638_0_supp_38939_p0ytzc.pdf [file supp_RA117.000539_134638_0_supp_38939_p0ytzc.pdf]
