# Supplementary material
Source: PubMed Central journal article supplement (PMC5880099)
Supplement: supp_RA117.000539_134638_0_supp_38940_p0yczc.pdf [file supp_RA117.000539_134638_0_supp_38940_p0yczc.pdf]

**Correlation between transcriptomics (1) and proteomics results for differential gene product expression in CLL vs healthy controls**

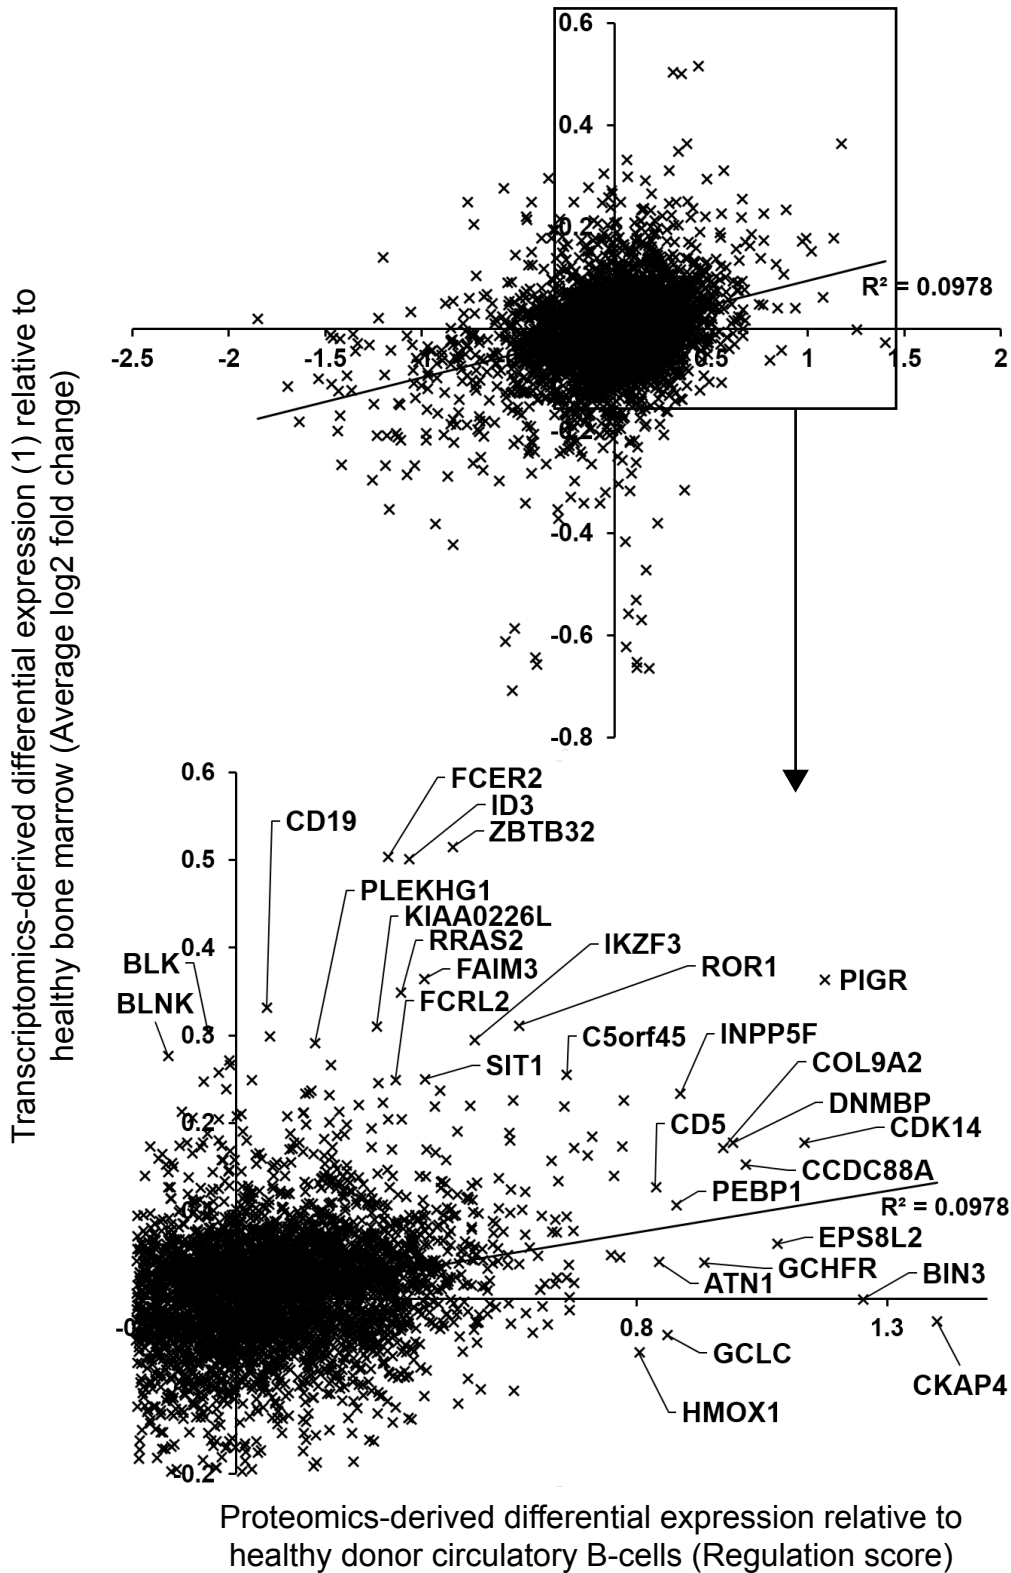

(1) Haferlach, T., Kohlmann, A., Wieczorek, L., Basso, G., Kronnie, G. T., Bene, M. C., De Vos, J., Hernandez, J. M., Hofmann, W. K., Mills, K. I., Gilkes, A., Chiaretti, S., Shurtleff, S. A., Kipps, T. J., Rassenti, L. Z., Yeoh, A. E., Papenhausen, P. R., Liu, W. M., Williams, P. M., and Foa, R. (2010) Clinical utility of microarray-based gene expression profiling in the diagnosis and subclassification of leukemia: report from the International Microarray Innovations in Leukemia Study Group. *J Clin Oncol* 28, 2529-2537
